# Supplementary material for: Comparison of the Single-Cell Immune Landscape of Testudines from Different Habitats
Source: MDPI journal article supplement (doi:10.3390/cells11244023), 2022-12-12
Supplement: s1 [file s1]

Supplementary Figure S1.

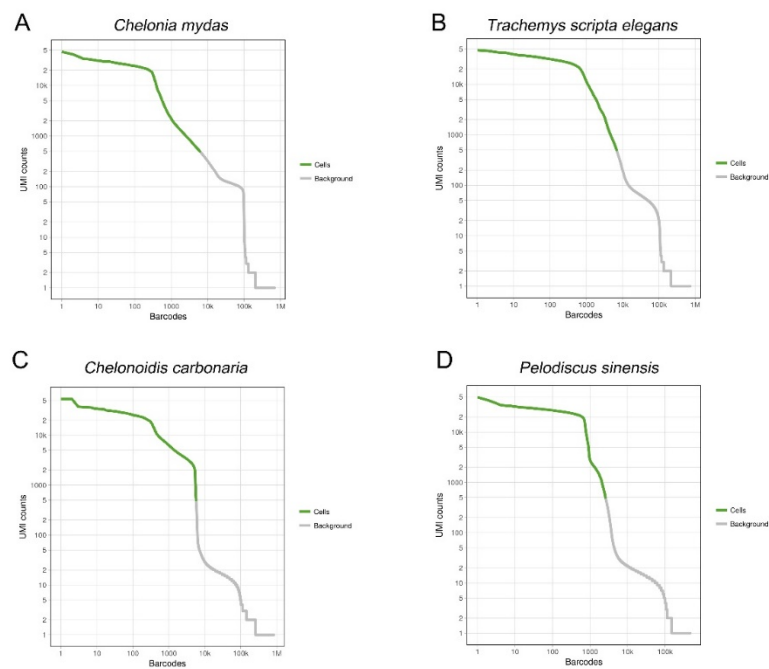

Figure S1. Map of valid cell identification

Supplementary Figure S2.

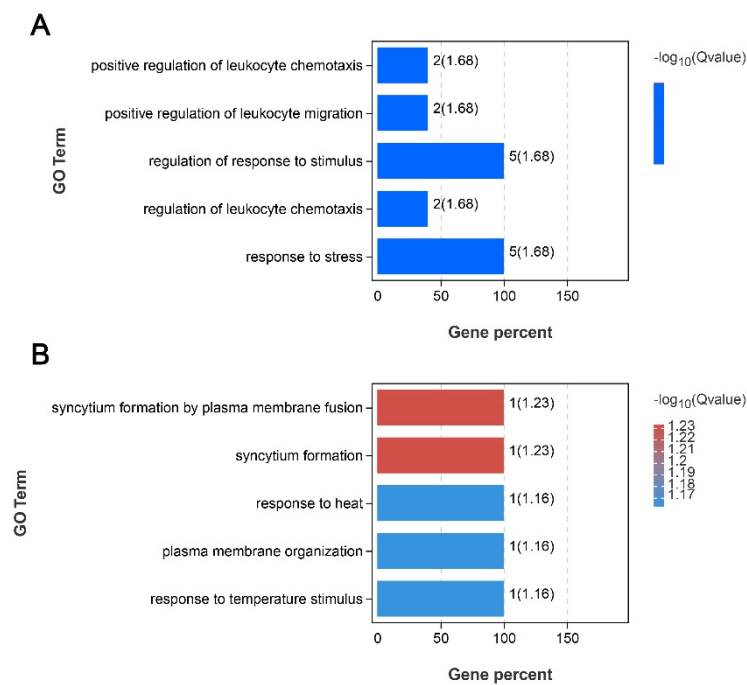

Figure S2. GO enrichment analysis. (A): LGALS1, LY86, PLBD1, MYOF, BPI, and CSF1R genes; (B): MYOF.

**Supplementary Table S1.** Morphological characteristics of testudines

| Species                          | Carapace length<br>(cm) | Carapace width<br>(cm) | Body weight<br>(kg) |
|----------------------------------|-------------------------|------------------------|---------------------|
| <i>Chelonia mydas</i>            | 74.2±5.2                | 65.7±6.0               | 43.1±5.8            |
| <i>Trachemys scripta elegans</i> | 24.5±1.6                | 17.8±1.2               | 2.2±0.3             |
| <i>Chelonoidis carbonaria</i>    | 19.9±0.7                | 12.9±0.2               | 1.5±0.1             |
| <i>Pelodiscus sinensis</i>       | 22.8±0.7                | 19.2±1.0               | 1.6±0.2             |

**Supplementary Table S2.** Number of cells in each sample before and after filtration

| Species                          | Retained | Excluded |
|----------------------------------|----------|----------|
| <i>Chelonia mydas</i>            | 2976     | 2912     |
| <i>Trachemys scripta elegans</i> | 5739     | 965      |
| <i>Chelonoidis carbonaria</i>    | 5507     | 110      |
| <i>Pelodiscus sinensis</i>       | 2356     | 178      |

**Supplementary Table S3.** The results of quality control

| Species                          | Number of<br>reads | Valid<br>barcodes | Sequencing<br>saturation | Q30 bases<br>in barcode | Q30 bases<br>in RNA<br>read | Q30 bases<br>in UMI |
|----------------------------------|--------------------|-------------------|--------------------------|-------------------------|-----------------------------|---------------------|
| <i>Chelonia mydas</i>            | 368,610,050        | 97.0%             | 84.7%                    | 95.3%                   | 92.2%                       | 94.4%               |
| <i>Trachemys scripta elegans</i> | 431,034,089        | 98.2%             | 81.8%                    | 95.5%                   | 91.5%                       | 94.6%               |
| <i>Chelonoidis carbonaria</i>    | 392,723,491        | 97.8%             | 81.9%                    | 95.6%                   | 92.3%                       | 94.8%               |
| <i>Pelodiscus sinensis</i>       | 443,802,858        | 98.2%             | 90.0%                    | 95.5%                   | 92.0%                       | 94.6%               |
